# Supplementary material for: DNA Copy Number Aberrations in Breast Cancer by Array Comparative Genomic Hybridization
Source: PubMed Central journal article supplement — Genomics Proteomics Bioinformatics. 2009 Jul 8;7(1-2):13–24. doi: 10.1016/S1672-0229(08)60029-7 (PMC5054221; doi:10.1016/s1672-0229(08)60029-7), 2009-07-08
Supplement: mmc1.pdf [file mmc1.pdf]

## Supporting Online Material

Li, J., *et al.* 2009. DNA copy number aberrations in breast cancer by array comparative genomic hybridization. *Genomics Proteomics Bioinformatics* 7: 13-24.

DOI: 10.1016/S1672-0229(08)60029-7

**Table S1 Frequently recurrent aberrations in 49 primary breast cancer samples**

| Cytogenetic loci | Start (bp) | End (bp)  | Start clone | End clone | Pattern       | Gain | Loss |
|------------------|------------|-----------|-------------|-----------|---------------|------|------|
| 1p36.31-33       | 5866184    | 47041895  | bA49J3      | bA8J9     | loss          | 10%  | 85%  |
| 1p33-q44         | 48002310   | 246181016 | bA330M19    | bA438H8   | gain and loss | 50%  | 47%  |
| 2p25.3-q37.3     | 596981     | 241796109 | bA125K7     | bA556H17  | gain          | 70%  | 13%  |
| 3p26.3-21.31     | 768376     | 46150224  | bA86C13     | bA91E8    | gain and loss | 53%  | 42%  |
| 3p21.31-21.1     | 47384084   | 52839788  | dJ544D10    | dJ966M1   | loss          | 23%  | 72%  |
| 3p21.1-q11.2     | 54007394   | 96250469  | bA122D19    | bA12A13   | gain and loss | 58%  | 37%  |
| 3q11.2-13.13     | 97022228   | 110272403 | bA12J13     | bA93N14   | gain          | 67%  | 28%  |
| 3q13.13-21.1     | 111576135  | 124037428 | bA286P15    | bA457E6   | gain and loss | 64%  | 31%  |
| 3q21.1-29        | 124853438  | 194023814 | bA9N20      | bA56C4    | gain          | 68%  | 25%  |
| 3q29             | 195537808  | 199160165 | bA279P10    | bA23M2    | gain and loss | 55%  | 38%  |
| 4p16.3-16.2      | 1065598    | 4366937   | bA296G16    | bA324I10  | gain and loss | 60%  | 36%  |
| 4p16.2-q35.1     | 4919317    | 186822363 | bA211H6     | bA301L8   | gain          | 70%  | 23%  |
| 4q35.1-35.2      | 187292771  | 190668407 | bA279K24    | bA45F23   | gain and loss | 64%  | 31%  |
| 5p15.33-q35.3    | 2570762    | 180060082 | bK2265D9    | bA451H23  | gain and loss | 44%  | 47%  |
| 6p25.3-q27       | 1241036    | 170509779 | bA13J16     | dJ1086L22 | gain and loss | 42%  | 49%  |
| 7p22.3-q36.3     | 1080569    | 157756716 | bA449P15    | bA518I12  | gain and loss | 54%  | 43%  |
| 8p23.3-q11.21    | 477653     | 49685914  | bA338B22    | bA567J20  | gain and loss | 40%  | 57%  |
| 8q11.21-24.3     | 49937832   | 146167102 | bA22C8      | dJ1056B24 | gain          | 91%  | 7%   |
| 9p24.3-q33.2     | 1340595    | 125649123 | bA66M18     | bA417B4   | gain and loss | 36%  | 56%  |
| 9q33.3-34.3      | 126127930  | 139715973 | bA101K10    | bA417A4   | loss          | 16%  | 76%  |
| 10p15.3-q26.3    | 1206029    | 135072261 | bA29A19     | bA122K13  | gain and loss | 41%  | 52%  |
| 11p15.5-q12.3    | 1585438    | 62271625  | bA295K3     | bA163K24  | gain and loss | 55%  | 40%  |
| 11q13.1          | 63543757   | 66035373  | bA424O11    | bA142G8   | loss          | 28%  | 67%  |
| 11q13.1-25       | 66710945   | 134156487 | bA126P21    | bA469N6   | gain and loss | 46%  | 50%  |
| 12p13.33-q13.13  | 152534     | 48970250  | bA283I3     | dJ405J10  | gain and loss | 40%  | 55%  |
| 12q13.13-13.3    | 49019643   | 56288135  | bA112N23    | bA181L23  | loss          | 28%  | 67%  |
| 12q13.3-24.22    | 56286203   | 116748345 | bA571M6     | bA110J12  | gain and loss | 38%  | 57%  |
| 12q24.23-24.33   | 117108431  | 132036472 | bA68H18     | bA46H11   | loss          | 20%  | 76%  |
| 13q12.11-34      | 19136604   | 113954546 | bA76K19     | bA245B11  | gain and loss | 42%  | 53%  |
| 14q11.2-23.2     | 19570817   | 62046831  | bA98N22     | bA559M6   | gain and loss | 41%  | 51%  |
| 14q23.2-32.33    | 63342212   | 105437086 | bA544I20    | bA417P24  | loss          | 25%  | 68%  |
| 15q11.2-26.3     | 20363717   | 100036168 | bA289D12    | bA14C10   | loss          | 20%  | 79%  |
| 16p13.3-11.2     | 11088      | 29730534  | bA344L6     | bA74E23   | gain and loss | 34%  | 65%  |
| 16p11.2-q12.1    | 30539964   | 45688066  | bA2C24      | bA283C7   | loss          | 23%  | 76%  |

|                |          |           |           |           |               |     |     |
|----------------|----------|-----------|-----------|-----------|---------------|-----|-----|
| 16q12.1-12.1   | 46446494 | 47397787  | bA523L20  | bA452G23  | gain and loss | 30% | 69% |
| 16q12.1        | 47238951 | 47397755  | bA452G23  | bA452G23  | loss          | 28% | 71% |
| 16q12.1-12.2   | 48210521 | 53975887  | bA305A7   | bA7O2     | gain and loss | 32% | 67% |
| 16q12.2-24.3   | 54425522 | 88643456  | bA165M2   | bA533D19  | loss          | 15% | 84% |
| 17p13.3-q21.32 | 801989   | 43043105  | bA216P6   | bA416K7   | loss          | 11% | 88% |
| 17q21.32-25.1  | 43957677 | 69639765  | bA361K8   | bA155C2   | gain and loss | 35% | 63% |
| 17q25.1-25.3   | 69779007 | 78374783  | bA478P5   | bA567O16  | loss          | 28% | 69% |
| 18p11.32-q23   | 168428   | 75701174  | bA324G2   | bA154H12  | gain and loss | 61% | 34% |
| 19p13.3-q13.43 | 183116   | 63516696  | bK3113P16 | bK3138B18 | loss          | 11% | 88% |
| 20p13-q13.33   | 275014   | 62284676  | dJ852M4   | bB152O15  | gain and loss | 40% | 59% |
| 21q11.2-22.3   | 13462479 | 46607897  | bA193B6   | bA178H12  | gain and loss | 51% | 48% |
| 22q11.23-13.33 | 22510132 | 49521447  | bA80O7    | bK799F10  | loss          | 14% | 85% |
| Xp22.32-22.2   | 4616007  | 10437613  | bA62N12   | dA1O2     | gain and loss | 30% | 69% |
| Xp22.2-q21.1   | 11152967 | 79447843  | dJ27C22   | bA217H19  | loss          | 28% | 71% |
| Xq21.1-28      | 80307294 | 153862276 | bA102P23  | bA402H20  | gain and loss | 31% | 68% |

**Table S2 Recurrent aberrations and correspondingly localized oncogenes or tumor suppressor genes in “normal” tissues, primary tumors, and lymph node metastases\***

| Cytogenetic loci | Start clone | End clone | N46 N47<br>N48 N49 | T46 T47<br>T48 T49 | M47 M49   | No. of clones | 30% primary tumors | Oncogenes or tumor suppressor genes in the regions                  |
|------------------|-------------|-----------|--------------------|--------------------|-----------|---------------|--------------------|---------------------------------------------------------------------|
| 1p36.32-34.1     | dJ37J18     | bA420M12  | loss               | loss               | loss      | 47            | 47                 | <i>PLEKHG5, TNFRSF9, TNFRSF8, TNFRSF1B, NBL1, FABP3</i>             |
| 1p13.3-12        | dJ1077K16   | bA418J17  | no change          | gain               | gain      | 16            | 0                  | <i>RAP1A, WNT2B, BCAS2</i>                                          |
| 1q21.1-22        | bA326G21    | bA172I6   | loss               | loss               | no change | 12            | 0                  | <i>LASS2, TNFAIP8L2, EFNA1</i>                                      |
| 1q23.3-44        | bA541J2     | bA438H8   | no change          | gain               | gain      | 86            | 86                 | <i>RASAL2, RABIF, RAB7L1, RASSF5, TGFB2, RAB3GAP2, WNT9A, WNT3A</i> |
| 3p25.3           | bA439F4     | bA438J1   | loss               | loss               | loss      | 4             | 0                  | <i>CIDEA, VHL</i>                                                   |
| 3p25.3-25.1      | bA94A14     | bA163D23  | loss               | no change          | loss      | 3             | 0                  |                                                                     |
| 3p22.1-21.1      | bA437N10    | dJ966M1   | loss               | loss               | loss      | 16            | 10                 | <i>RBM5, TUSC2, TUSC4, CYB561D2</i>                                 |
| 3q26.33-27.3     | bA416O18    | bA119E13  | loss               | no change          | loss      | 7             | 0                  |                                                                     |
| 3q29             | bA279P10    | bA23M2    | loss               | loss               | loss      | 7             | 0                  | <i>PAK2</i>                                                         |
| 4p16.3           | bA296G16    | bA572O17  | loss               | loss               | loss      | 3             | 0                  |                                                                     |
| 5q35.2-35.3      | bK1087L24   | bA451H23  | loss               | no change          | loss      | 8             | 0                  |                                                                     |
| 8p23.3-23.2      | bA338B22    | bA104F14  | no change          | gain               | gain      | 5             | 0                  |                                                                     |
| 8q11.21-24.3     | bA22C8      | dJ1056B24 | no change          | gain               | gain      | 106           | 105                |                                                                     |
| 9q33.3-34.3      | bA101K10    | bA417A4   | loss               | loss               | loss      | 15            | 13                 | <i>MAPKAP1, PTGES, TRAF2</i>                                        |
| 10q21.3-22.2     | bA297N15    | bA345K20  | loss               | loss               | no change | 7             | 0                  | <i>CCAR1, AMID, UNC5B</i>                                           |
| 11p15.4-13       | bA309J20    | dJ85M6    | no change          | gain               | gain      | 31            | 0                  |                                                                     |

|                 |           |           |           |           |           |     |     |                                                                |
|-----------------|-----------|-----------|-----------|-----------|-----------|-----|-----|----------------------------------------------------------------|
| 11q12.2-13.1    | bA286N22  | bA142G8   | loss      | loss      | loss      | 9   | 7   | <i>DDB1, BRMS1</i>                                             |
| 11q13.1         | bA126P21  | bA126P21  | loss      | loss      | no change | 1   | 1   |                                                                |
| 11q13.2-14.1    | bA569N5   | bA7H7     | no change | gain      | gain      | 16  | 0   |                                                                |
| 12q13.11-13.3   | bA89H19   | bA571M6   | loss      | loss      | loss      | 16  | 0   | <i>DDIT3</i>                                                   |
| 12q24.23-24.31  | bA144B2   | bA338K17  | loss      | loss      | loss      | 6   | 0   | <i>CDK2API</i>                                                 |
| 12q24.31        | bA214K3   | bA158L12  | no change | loss      | loss      | 2   | 0   |                                                                |
| 16p13.3         | bA344L6   | bA127I20  | loss      | loss      | loss      | 8   | 7   | <i>CIQTNF8, TNFRSF12A, Q8NFX8_HUMAN, TRAP1</i>                 |
| 16p13.3-11.2    | bA518I8   | bA274A17  | loss      | loss      | no change | 34  | 2   | <i>TNFRSF17, ERCC4, BFAR</i>                                   |
| 16q11.2-q12.1   | bA5L1     | bA283C7   | loss      | loss      | loss      | 3   | 3   | <i>DNAJA2</i>                                                  |
| 16q21-24.3      | bA63M22   | bA533D19  | loss      | loss      | loss      | 33  | 33  | <i>TRADD, GAS8</i>                                             |
| 17p13.3-q25.3   | bA216P6   | bA567O16  | loss      | loss      | loss      | 119 | 110 | <i>TUSC5, TP53, TNFRSF13B, TNFAIP1, TP53I13, BRCA1, RAD51C</i> |
| 19p13.3-q13.43  | bK3113P16 | bK3138B18 | loss      | loss      | loss      | 71  | 71  | <i>VGLL3, GLTSCR1</i>                                          |
| 20p13-12.3      | dJ852M4   | dJ764O22  | loss      | no change | loss      | 7   | 0   |                                                                |
| 20p11.21        | dJ234M6   | dJ234M6   | loss      | no change | loss      | 1   | 0   |                                                                |
| 20p11.21-q11.23 | dJ1025A1  | dJ469A13  | loss      | loss      | loss      | 15  | 0   | <i>PDRG1, TP53INP2</i>                                         |
| 20q11.23-13.33  | dJ633O20  | bB152O15  | loss      | no change | loss      | 38  | 0   | <i>NA</i>                                                      |
| 22q11.23-13.33  | bA8007    | bK799F10  | loss      | loss      | loss      | 41  | 41  | <i>FAM10A6, TNFRSF13C</i>                                      |
| Xp22.32-q28     | bA62N12   | bA402H20  | no change | loss      | loss      | 142 | 72  | <i>NA</i>                                                      |

\*Four “normal” breast tissues were obtained from patients No.46–49 (N46–N49), four primary tumor samples from patients No.46–49 (T46–T49), and two axillary lymph node metastases from patients No.47 and 49 (M47 and M49).

**Table S3 Summary of the performance of classification with respect to different clinicopathological parameters**

| <b>Classifier</b>                                                 | <b>No. of clones</b> | <b>Recurrent clones*<sup>1</sup></b>                                                                                                                                                                                                          | <b>Accuracy*<sup>2</sup></b> | <b>P value*<sup>3</sup></b> | <b>Sensitivity</b> | <b>Specificity</b> |
|-------------------------------------------------------------------|----------------------|-----------------------------------------------------------------------------------------------------------------------------------------------------------------------------------------------------------------------------------------------|------------------------------|-----------------------------|--------------------|--------------------|
| ALN metastases vs primary tumors                                  | 18                   | 0                                                                                                                                                                                                                                             |                              |                             |                    |                    |
| ALN <sup>+</sup> vs ALN <sup>-</sup>                              | 17                   | 0                                                                                                                                                                                                                                             |                              |                             |                    |                    |
| Ductal vs Lobular                                                 | 42                   | bA303E16_1, bA123C5, bA354N7, bA298C15, bA229O3, bA148F12, bA303E16, bA467L24, bA370P15, bA298C15_1, bA76H6, bA281J9, bA200H5, dJ991G20, bA70E3, bA24I3, bA556H2, bA328J14, bA77K12, bA285K4, bA467O15                                        | 94.4%                        | 0.2083                      | 100%               | 30%                |
| IDC ER <sup>-</sup> vs IDC ER <sup>+</sup> vs ILC ER <sup>+</sup> | 13                   | 0                                                                                                                                                                                                                                             |                              |                             |                    |                    |
| ER <sup>+</sup> vs ER <sup>-</sup>                                | 144                  | bA388F14, bA292F22, bA534N5, bA432I13, bA488L1, bA471L13, bA38B21, dJ27J12, bA124O11, bA560C7, bA13E1, bA463P17, bA23F10, bA368O18, bA557N21, bA532F4, bA47O13, bA541M12, bA556E13, bA548F5, bA313B15, bA430K23, bA183D3, bA557N21_1, bA35P15 | 85.7%                        | 1.398×10 <sup>-4</sup>      | 46.2%              | 86.1%              |

|                                                                                                          |     |                                                                                                                                                                                                                                  |       |                        |       |       |
|----------------------------------------------------------------------------------------------------------|-----|----------------------------------------------------------------------------------------------------------------------------------------------------------------------------------------------------------------------------------|-------|------------------------|-------|-------|
| PgR <sup>+</sup> vs PgR <sup>-</sup>                                                                     | 91  | bA564A8, bA469A15, bA572A16, bA480I12, bA739N20, bA563I16, bA430C7, bA383G10, bA534L20, bA286E7, bA354K1, dJ879K22, bA385M4, bA59A2, bA323K10, bA434B7, dJ799G3, bA46A10, bA12M5, bA538D16, bA163L4, dJ1045J21, dJ990P15, bA71D4 | 45.8% | 0.7676                 | 57.7% | 72.7% |
| ER <sup>-</sup> PgR <sup>-</sup> vs ER <sup>+</sup> PgR <sup>-</sup> vs ER <sup>+</sup> PgR <sup>+</sup> | 46  | dJ986F12, bA445F12, bA474K4, bA534N5, bA432I13, bA292F22                                                                                                                                                                         | 66.7% | 0.036                  |       |       |
| HER2/neu <sup>+</sup> vs HER2/neu <sup>-</sup>                                                           | 72  | dJ1112G21, bA115K3, bA58O9, bA94L15, dJ906A24, dJ986F12, bA390P24, bA432I21, bK58E17, dJ1110E20, dJ466A11, bK250D10, dJ437M21, dJ979N1, dJ355C18, bA422A16, bA12M9, bK229A8, dJ85F18                                             | 90.0% | 5.079×10 <sup>-7</sup> | 82.4% | 66.7% |
| Size (small vs moderate vs large)                                                                        | 6   | 0                                                                                                                                                                                                                                |       |                        |       |       |
| Size (small vs large)                                                                                    | 48  | 0                                                                                                                                                                                                                                |       |                        |       |       |
| Grade 1 vs 2 vs 3                                                                                        | 107 | bA23F10, bA557N21, bA560C7, bA368O18, bA9O10, bA535E19, bA142A12, bA343N14, bA419E14, bA245N4                                                                                                                                    | 61.9% | 0.04                   |       |       |
| Grade (1+2) vs 3                                                                                         | 14  | 0                                                                                                                                                                                                                                |       |                        |       |       |
| Grade 1 vs (2+3)                                                                                         | 47  | bA329J7, bK57G9, dJ76B20, dJ539M6, dJ353E16                                                                                                                                                                                      | 66.7% | 1                      | 12.5% | 100%  |

---

|                                      |    |                                                                                                                                                    |       |        |       |       |
|--------------------------------------|----|----------------------------------------------------------------------------------------------------------------------------------------------------|-------|--------|-------|-------|
| High grade vs Low grade <sup>#</sup> | 52 | bA15G16, bA430G6, bK29F11, bA206M24, bA393K10, bA190A12, bA137A12, bA5K23, cN75H12, dJ398C22, bK268H5, dJ925J7, bK299D3, bK397C4, dJ388M5, bK722E9 | 73.9% | 0.0393 | 75.0% | 73.3% |
|--------------------------------------|----|----------------------------------------------------------------------------------------------------------------------------------------------------|-------|--------|-------|-------|

---

\*<sup>1</sup>The recurrent clones in each classifier in at least 70% of samples.

\*<sup>2</sup>The performance of LOOCV absolute errors for each clinicopathological parameter based on the recurrent clones was calculated. Accuracy was calculated based on the corresponding LOOCV.

\*<sup>3</sup>Fisher exact test was applied for estimation of statistical significance of each classifier for two class prediction. Chi square test was used for the result of three class prediction. The corresponding *P* values are presented.

<sup>#</sup>All the clones of this classifier were used since limiting it for clones recurring in more than 70% of high- and low-grade tumors does not give as satisfactory performance.
